# Supplementary material for: Pressure-induced superconductivity in H2-containing hydride PbH4(H2)2
Source: PubMed Central journal article supplement (PMC4642309; doi:10.1038/srep16475), 2015-11-12
Supplement: srep16475-s1.pdf [file srep16475-s1.pdf]

## Supplementary information

### Pressure-induced superconductivity in H<sub>2</sub>-containing hydriden

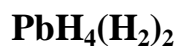

Ya Cheng,<sup>1</sup> Chao Zhang,<sup>2</sup> Tingting Wang,<sup>1</sup> Guohua Zhong,<sup>1,\*</sup> Chunlei

Yang<sup>1,†</sup>, Xiao-Jia Chen<sup>3</sup> and Hai-Qing Lin<sup>4,1</sup>

<sup>1</sup>*Shenzhen Institutes of Advanced Technology, Chinese Academy of Sciences and The Chinese University of Hong Kong, Shenzhen 518055, China*

<sup>2</sup>*Department of Physics, Yantai University, Yantai, 264005, China*

<sup>3</sup>*Center for High Pressure Science and Technology Advanced Research, Shanghai 201203, China*

<sup>4</sup>*Beijing Computational Science Research Center, Beijing 100089, China*

**Table S1.** Lattice parameters and atomic coordinates of  $\text{PbH}_4(\text{H}_2)_2$  at difference pressures.

| space group | Pressure (GPa) | Lattice parameters ( $\text{\AA}$ , deg) | atom     | x        | y        | z        |
|-------------|----------------|------------------------------------------|----------|----------|----------|----------|
| <i>Pnmm</i> | 20             | a=4.820                                  | Pb1(2c)  | 0.00000  | 0.50000  | -1.00000 |
|             |                | b=13.626                                 | Pb2(2a)  | 0.00000  | 0.00000  | -1.00000 |
|             |                | c=3.512                                  | H1(4g)   | 0.48622  | 0.70157  | -1.00000 |
|             |                | $\alpha=\beta=\gamma=90$                 | H2(4g)   | 0.51304  | 0.35404  | -1.00000 |
|             |                | H3(4g)                                   | 0.76642  | 0.20436  | -1.00000 |          |
|             |                | H4(4g)                                   | 0.70258  | 0.85072  | -1.00000 |          |
|             |                | H5(4g)                                   | 0.26227  | 0.20350  | -1.00000 |          |
|             |                | H6(4g)                                   | 0.00796  | 0.28016  | -1.00000 |          |
|             |                | H7(4g)                                   | 0.52301  | 0.16424  | -1.00000 |          |
| H8(4g)      | 0.22661        | 0.34951                                  | -1.00000 |          |          |          |
| <i>P-1</i>  | 160            | a=2.896                                  | Pb1 (2i) | 1.16788  | 0.14745  | -0.84911 |
|             |                | b=4.161                                  | H1 (2i)  | 2.54257  | -0.52858 | -1.26204 |
|             |                | c=5.629                                  | H2 (2i)  | 4.86030  | -1.30130 | -1.75250 |
|             |                | $\alpha=71.0$                            | H3 (2i)  | 0.61711  | 0.29962  | -0.55204 |
|             |                | $\beta=88.2$                             | H4 (2i)  | 0.64295  | 0.30721  | -0.41449 |
|             |                | $\gamma=70.8$                            | H5 (2i)  | 3.04141  | -0.54666 | -1.37609 |
|             |                | H6 (2i)                                  | 0.55130  | 0.42805  | -0.11390 |          |
|             |                | H7 (2i)                                  | 1.26202  | -0.00233 | -0.41815 |          |
|             |                | H8 (2i)                                  | 1.18245  | 0.19620  | -0.51149 |          |
| <i>C2/m</i> | 200            | a=7.184                                  | Pb1(2a)  | 0.00000  | 0.00000  | 0.00000  |
|             |                | b=2.807                                  | H1(4i)   | -0.77734 | 0.00000  | 2.30255  |
|             |                | c=2.973                                  | H2(4i)   | -0.79226 | 0.50000  | 2.42086  |
|             |                | $\alpha=\gamma=90$                       | H3(4i)   | -0.78633 | -0.50000 | 0.97864  |
|             |                | $\beta=68.1$                             | H4(4i)   | -0.90858 | -0.50000 | 1.43768  |

**Table S2.** Lattice parameters and atomic coordinates of PbH<sub>3</sub> at special pressures.

| space group                    | Pressure<br>(GPa) | Lattice<br>parameters<br>(Å, deg)          | atom     | x       | y       | z       |
|--------------------------------|-------------------|--------------------------------------------|----------|---------|---------|---------|
| <i>P4/mmm</i><br>(<45 GPa)     | 30                | a=4.015                                    | Pb1(1a)  | 0.00000 | 0.00000 | 0.00000 |
|                                |                   | b=4.015                                    | Pb2(1c)  | 0.50000 | 0.50000 | 0.00000 |
|                                |                   | c=4.422                                    | H1(2h)   | 0.50000 | 0.50000 | 0.41369 |
|                                |                   | $\alpha=\beta=\gamma=90$                   | H2(4m)   | 0.40154 | 0.00000 | 0.50000 |
| <i>C2/c</i><br>(45-110<br>GPa) | 80                | a=4.416                                    | Pb1 (4a) | 0.00000 | 0.00000 | 0.00000 |
|                                |                   | b=8.505                                    | Pb2 (4e) | 0.00000 | 0.32201 | 0.25000 |
|                                |                   | c=5.543                                    | H1 (4c)  | 0.25000 | 0.25000 | 0.00000 |
|                                |                   | $\alpha=90$<br>$\beta=91.4$<br>$\gamma=90$ | H2 (4b)  | 0.00000 | 0.50000 | 0.00000 |
|                                |                   |                                            | H3 (4d)  | 0.25000 | 0.25000 | 0.50000 |
|                                |                   | H4 (4e)                                    | 0.00000  | 0.68690 | 0.25000 |         |
| <i>I4/mmm</i><br>(>110 GPa)    | 150               | a=3.366                                    | Pb1(2b)  | 0.00000 | 0.00000 | 0.50000 |
|                                |                   | b=3.366                                    | H1(2a)   | 0.00000 | 0.00000 | 0.00000 |
|                                |                   | c=3.772<br>$\alpha=\beta=\gamma=90$        | H2(4d)   | 0.00000 | 0.50000 | 0.25000 |

**Table S3.** Lattice parameters and atomic coordinates of PbH<sub>2</sub> at special pressures.

| space group                  | Pressure<br>(GPa) | Lattice<br>parameters<br>(Å, deg) | atom     | x       | y       | z       |  |
|------------------------------|-------------------|-----------------------------------|----------|---------|---------|---------|--|
| <i>I4/mcm</i><br>(<68 GPa)   | 30                | a=4.070                           | Pb1(8g)  | 0.00000 | 0.50000 | 0.84400 |  |
|                              |                   | b=4.070                           | H1(32m)  | 0.29940 | 0.20060 | 0.97530 |  |
|                              |                   | c=15.041                          |          |         |         |         |  |
|                              |                   | $\alpha=\beta=\gamma=90$          |          |         |         |         |  |
| <i>Cm</i><br>(68-140<br>GPa) | 100               | a=3.724                           | Pb1 (2a) | 0.00025 | 0.00000 | 0.03751 |  |
|                              |                   | b=9.530                           | Pb2 (4b) | 0.50005 | 0.14877 | 0.49025 |  |
|                              |                   | c=3.936                           | H1 (2a)  | 0.00030 | 0.00000 | 0.56036 |  |
|                              |                   | $\alpha=90$                       | H2 (4b)  | 0.50002 | 0.24996 | 0.98796 |  |
|                              |                   | $\beta=93.9$                      | H3 (4b)  | 0.74994 | 0.75004 | 0.97751 |  |
|                              |                   | $\gamma=90$                       | H4 (2a)  | 0.49945 | 0.00000 | 0.87817 |  |
| <i>Cmmm</i><br>(>140 GPa)    | 150               | a=3.937                           | Pb1(2c)  | 0.00000 | 0.50000 | 0.50000 |  |
|                              |                   | b=3.638                           | H1(4g)   | 0.39948 | 0.50000 | 0.00000 |  |
|                              |                   | c=2.725                           |          |         |         |         |  |
|                              |                   | $\alpha=\beta=\gamma=90$          |          |         |         |         |  |

**Table S4.** Lattice parameters and atomic coordinates of PbH at special pressures.

| space group                     | Pressure<br>(GPa) | Lattice<br>parameters<br>(Å, deg)              | atom    | x       | y       | z       |
|---------------------------------|-------------------|------------------------------------------------|---------|---------|---------|---------|
| <i>C2</i><br>(<32 GPa)          | 20                | a=5.590                                        | Pb1(4c) | 0.75459 | 0.91455 | 0.64315 |
|                                 |                   | b=9.214                                        | Pb2(2a) | 0.00000 | 0.16874 | 0.00000 |
|                                 |                   | c=3.092                                        | H1(2b)  | 0.00000 | 0.66666 | 0.50000 |
|                                 |                   | $\alpha=\gamma=90$<br>$\beta=93.3$             | H2(4c)  | 0.00303 | 0.66775 | 0.16443 |
| <i>P4/nmm</i><br>(32-97<br>GPa) | 60                | a=2.901                                        | Pb (2c) | 0.00000 | 0.50000 | 0.72817 |
|                                 |                   | b=2.901                                        | H (2c)  | 0.00000 | 0.50000 | 0.12580 |
|                                 |                   | c=4.952<br>$\alpha=\beta=\gamma=90$            |         |         |         |         |
| <i>Cmcm</i><br>(>97 GPa)        | 150               | a=4.235                                        | Pb(4c)  | 0.00000 | 0.77521 | 0.75000 |
|                                 |                   | b=4.281<br>c=3.925<br>$\alpha=\beta=\gamma=90$ | H(4c)   | 0.00000 | 0.30866 | 0.75000 |

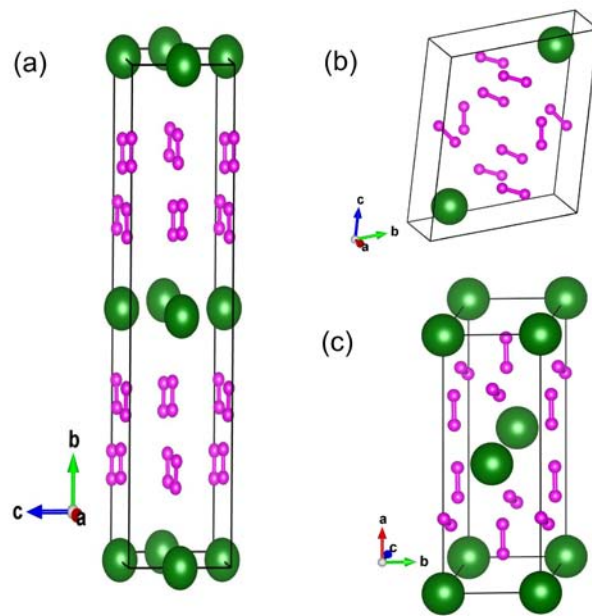

**Fig. S1** Structures of  $PbH_4(H_2)_2$ . (a)  $Pnnm$  structure at 20 GPa, (b)  $P-1$  structure at 100 GPa, (c)  $C2/m$  structure at 200 GPa. Large and small spheres represent Pb and H atoms, respectively.

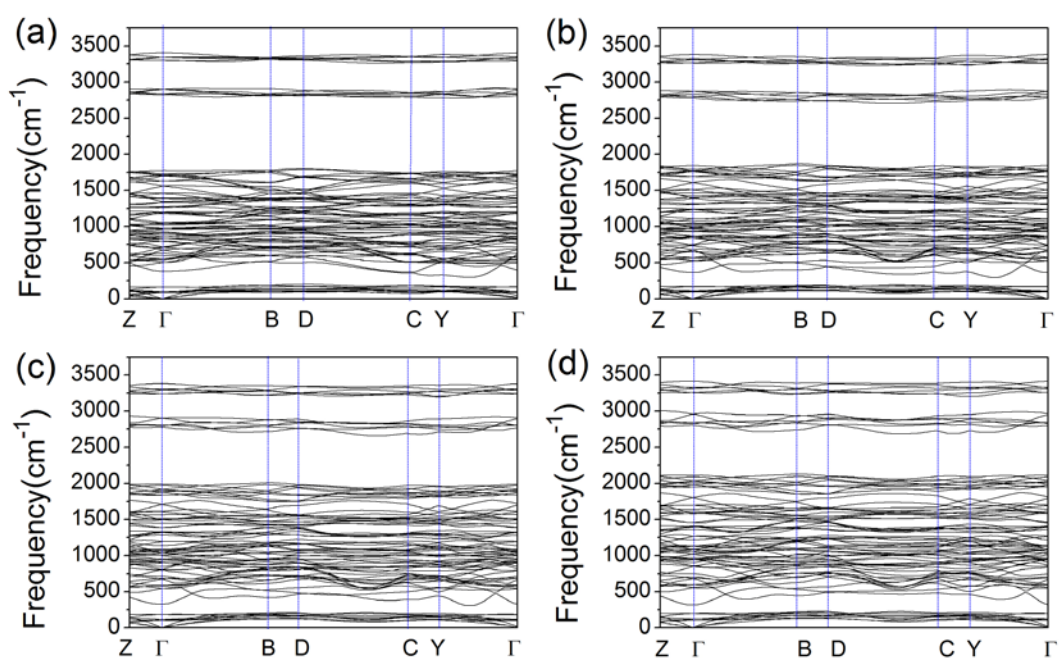

**Fig. S2 Phonon spectra.** Calculated phonon frequencies of  $C2/m$  at 180 GPa (a), 200 GPa (b), 250 GPa (c), and 300 GPa (d), respectively.

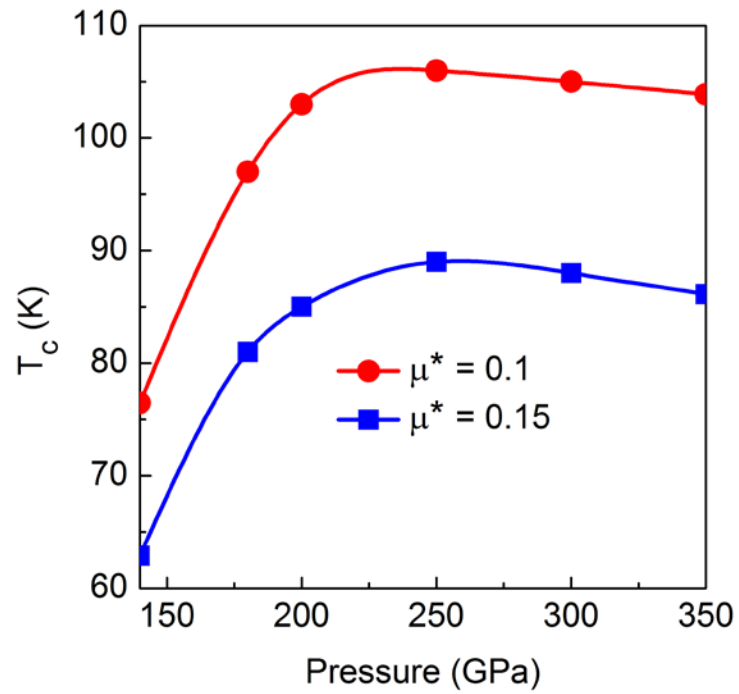

**Fig. S3** Pressure effect of  $T_c$ . Calculated  $T_c$  dependence on pressure for  $C2/m$  phase in the range of 133-350 GPa.



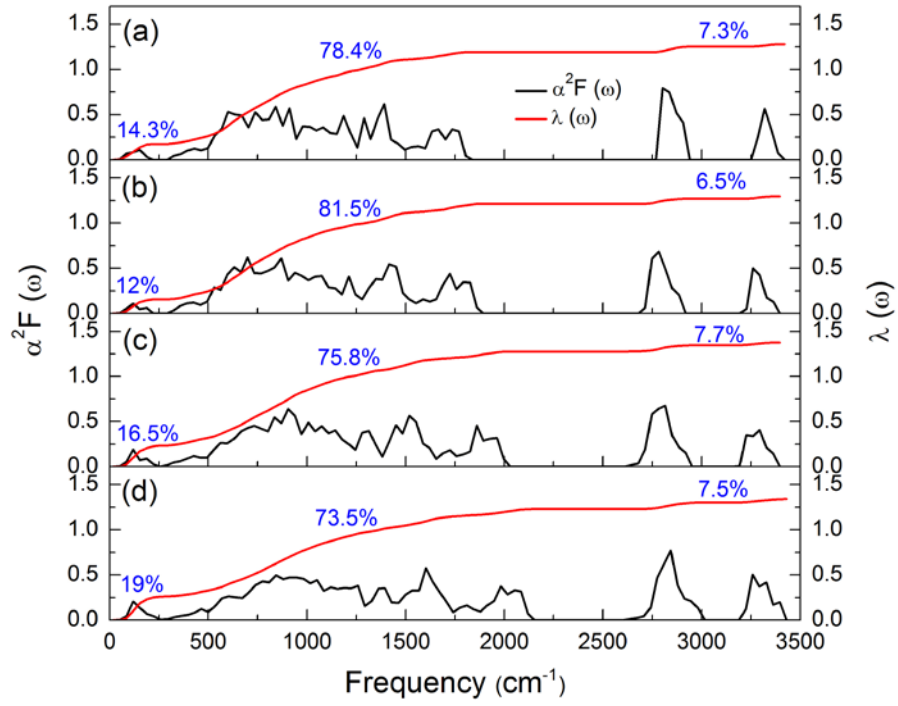

**Fig. S4 Phonon properties and Eliashberg spectral function.** Calculated Eliashberg phonon spectral function  $\alpha^2F(\omega)$  and electron-phonon integral  $\lambda(\omega)$  for the  $C2/m$  structure. (a) at 180 GPa,  $\lambda=1.280$ , (b) at 200 GPa,  $\lambda=1.296$ , (c) at 250 GPa,  $\lambda=1.379$ , (d) at 300 GPa,  $\lambda=1.341$ .
